# Supplementary material
Source: publisher figshare collection journal article supplement (https://acs.figshare.com/ndownloader/files/4492357)
Supplement: Supplementary file 1 [file 4492357]

# Energy Transfer between Confined Dye and Surface Attached Au Nanoparticles of Mesoporous Silica

Tapasi Sen<sup>†</sup>, Sreyashi Jana<sup>‡</sup>, Subratanath Koner<sup>\*‡</sup> and Amitava Patra<sup>†\*</sup>

<sup>†</sup>Department of Materials Science, Indian Association for the Cultivation of Science,  
Kolkata 700 032, India

<sup>‡</sup>Department of Chemistry, Jadavpur University, Kolkata 700 032, India

## Supplementary Information

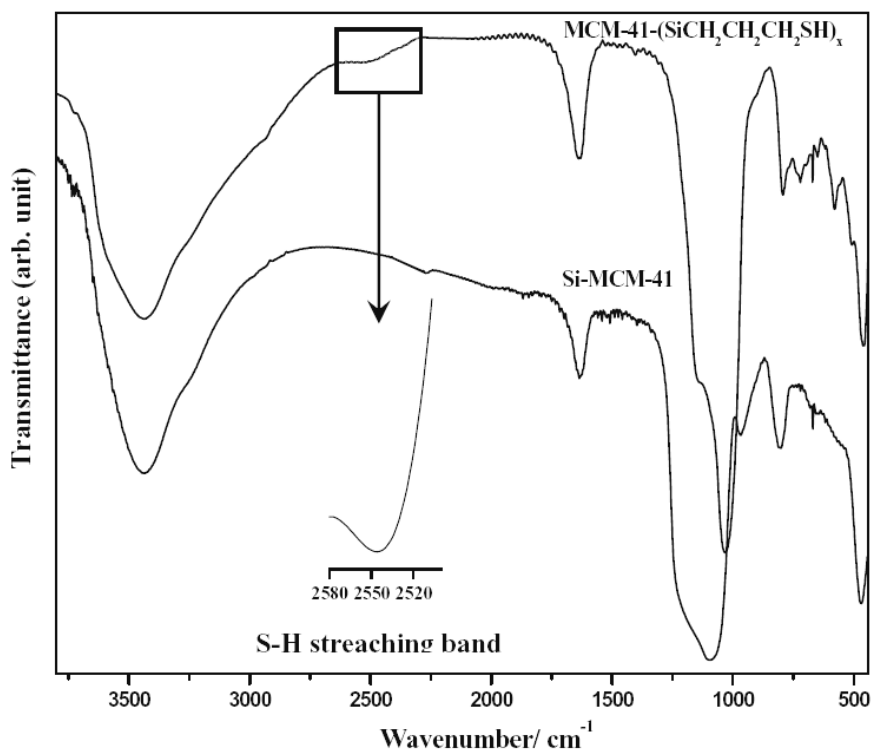

Figure S1. IR spectra of Si-MCM-41 and MCM-41-(SiCH<sub>2</sub>-CH<sub>2</sub>CH<sub>2</sub>SH)<sub>x</sub>.

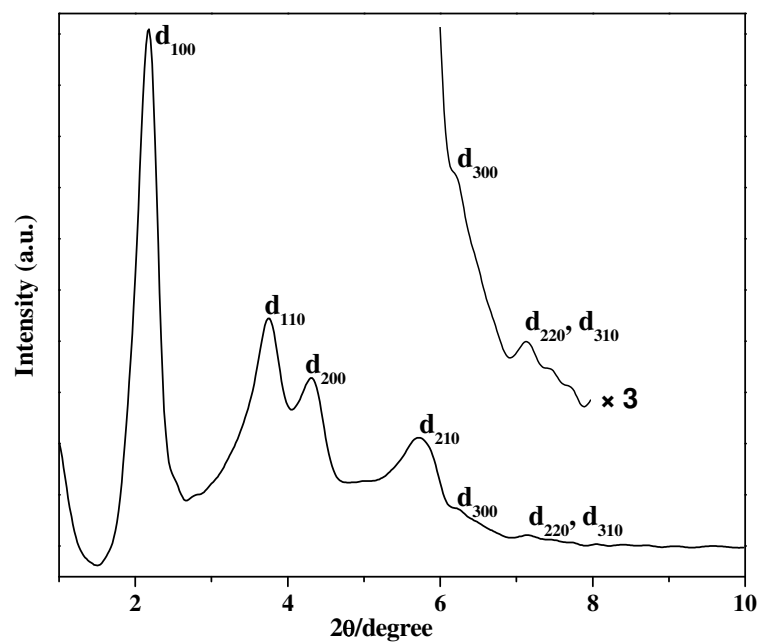

**Figure S2.** Small angle X-ray diffraction pattern of MCM-41.

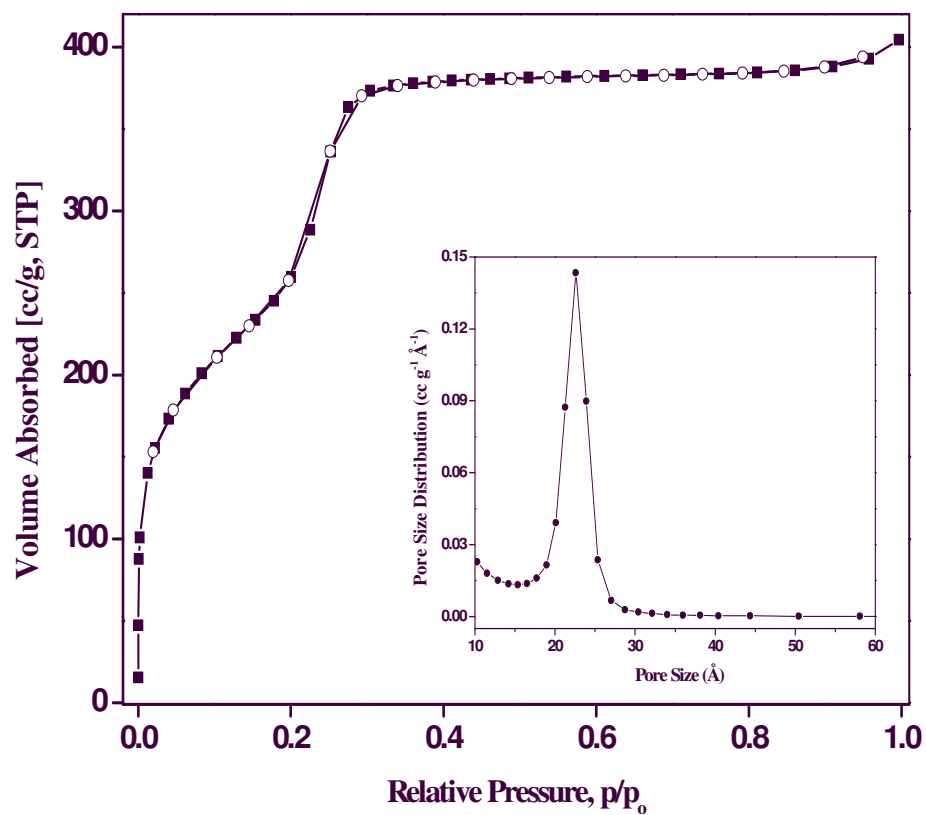

**Figure S3.** N<sub>2</sub> adsorption/desorption isotherms of Si-MCM-41. Adsorption points are marked by filled square, and that for desorption ones are by open circles. Pore size distribution has been shown in the inset.
